## **Epidemiology and antimicrobial resistance characteristics of the ST131-*H30* subclone among extraintestinal *Escherichia coli* collected from US children**

Arianna Miles-Jay<sup>1,3</sup>, Scott J. Weissman<sup>2,3</sup>, Amanda L. Adler<sup>3</sup>, Veronika Tchesnokova<sup>4</sup>, Evgeni V. Sokurenko<sup>4</sup>, Janet G. Baseman<sup>1</sup>, Danielle M. Zerr<sup>2,3</sup>

### **Affiliations**

1. Department of Epidemiology, University of Washington, Seattle, WA, USA
2. Department of Pediatrics, University of Washington, Seattle, WA, USA
3. Seattle Children's Research Institute, Seattle, WA, USA
4. Department of Microbiology, University of Washington, Seattle, WA, USA

**Keywords:** *E. coli* infections; ST131; antimicrobial resistance; pediatric infections

**Running Title:** *E. coli* ST131-*H30* in US children

**Summary:** ST131-*H30* was responsible for 5.3% of all extraintestinal *E. coli* infections and 43.3% of ESBL-producing extraintestinal *E. coli* infections among US children. The clinical and demographic correlates of infection with ST131-*H30* differed between extended-spectrum cephalosporin-resistant and -sensitive isolates.

### **Corresponding author (pre-publication):**

Arianna Miles-Jay, MPH  
University of Washington School of Public Health  
1959 NE Pacific St  
Health Sciences Building  
Box 357236  
Seattle, WA 98105  
206-884-1565  
[admiles@uw.edu](mailto:admiles@uw.edu)

### **Alternate corresponding author (post-publication):**

Danielle M Zerr, MD, MPH  
Department of Pediatrics,  
University of Washington  
Seattle Children's Hospital  
4800 Sand Point Way, NE  
Seattle, WA 98105  
206-987-2653  
[danielle.zerr@seattlechildrens.org](mailto:danielle.zerr@seattlechildrens.org)

## ABSTRACT

**Background:** *E. coli* ST131-*H30* is a globally important pathogen implicated in rising rates of multidrug resistance among *E. coli* causing extraintestinal infections. Previous studies have focused on adults, leaving the epidemiology of *H30* among children undefined.

**Methods:** We used clinical data and isolates from a case-control study of extended-spectrum cephalosporin-resistant *E. coli* conducted at four US children's hospitals to estimate the burden and identify host correlates of infection with *H30*. *H30* isolates were identified using two-locus genotyping; host correlates were examined using log-binomial regression models stratified by extended-spectrum cephalosporin resistance status.

**Results:** A total of 339 extended-spectrum cephalosporin-resistant and 1008 extended-spectrum cephalosporin-susceptible *E. coli* isolates were available for analyses. The estimated period prevalence of *H30* was 5.3% among all extraintestinal *E. coli* isolates (95% confidence interval [CI] 4.6%-7.1%); *H30* made up 43.3% (81/187) of ESBL-producing isolates in this study. Host correlates of infection with *H30* differed by extended-spectrum cephalosporin resistance status: among resistant isolates, age  $\leq 5$  years was positively associated with *H30* infection (relative risk [RR] 1.83, 95% CI 1.19-2.83); among susceptible isolates, age  $\leq 5$  years was negatively associated with *H30* (RR 0.48, 95% CI 0.27-0.87), while presence of an underlying medical condition was positively associated (RR 4.49, 95% CI 2.43-8.31).

**Conclusions:** ST131-*H30* is less common among extraintestinal *E. coli* collected from children compared to reported estimates among adults, possibly reflecting infrequent fluoroquinolone use in pediatrics; however, it is similarly dominant among ESBL-producing isolates. The *H30* subclone appears to disproportionately affect young children relative to other extended-spectrum cephalosporin-resistant *E. coli*.

## INTRODUCTION

Extraintestinal *Escherichia coli*, a common cause of urinary tract and bloodstream infections across all ages, have displayed increasing rates of antimicrobial resistance over the past two decades.[1] This increase has been attributed to the emergence and rapid clonal expansion of *E. coli* Sequence Type (ST) 131, which has transformed the population structure of extraintestinal *E. coli* infections worldwide.[2–5] Molecular epidemiologic studies have shown that a subclone of ST131, termed *H30*, has driven the global dissemination of ST131.[6–9] The clonal structure of ST131-*H30* is tightly linked to antimicrobial resistance; the vast majority of *H30* isolates are fluoroquinolone resistant due to mutations in the *gyrA* and *parC* chromosomal genes (isolates known as *H30-R* or clade C), while nested subclones are additionally associated with the production of CTX-M-type extended-spectrum beta-lactamases (ESBLs) that confer resistance to extended-spectrum cephalosporins (Figure S1).[7,8,10–12]

Although *E. coli* ST131-*H30* (hereafter, *H30*) has been recognized as a clone of significant public health importance,[5,13] there is a lack of data about its epidemiology in children. Most studies that have included *H30* isolates from children have occurred over short time periods at single centers and have accumulated few *H30* isolates.[14–16] Among adults in the US, *H30* is estimated to comprise about 50% of ESBL-producing *E. coli* infections and 10%-20% of all extraintestinal *E. coli* infections, and has been linked to host factors including older age, healthcare contact, local or systemic compromise, and recent antibiotic use.[6,14–17]

Associations with adverse outcomes such as persistent infections, new infections, sepsis, and hospitalization have also been reported in adult populations.[7,14,18] Understanding the epidemiology of *H30* in pediatric populations is important, as its dominance among multidrug-resistant (MDR) extraintestinal *E. coli* makes it a likely culprit of many difficult-to-treat infections in children. Proper treatment of urinary tract infections – the most common type of infection caused by extraintestinal *E. coli* – is especially critical in pediatric populations, as young children

are more prone to upper urinary tract infection with potential short- and long-term complications such as renal scarring and decreased renal function.[19,20]

We sought to address this knowledge gap using data from a multiyear, multicenter prospective case-control study of extraintestinal *E. coli* infections to quantify the burden and identify clinical and demographic correlates of infection with *H30* in a US pediatric population. In addition, we describe and compare the antimicrobial resistance characteristics of *H30* and non-*H30* *E. coli* isolates.

## **METHODS**

### **Patients and isolates**

All isolates and clinical data came from a multicenter case-control study that prospectively collected isolates and is described in detail elsewhere.[21] In brief, between September 1, 2009 and September 30, 2013, four freestanding US children's hospitals (referred to here as West, Midwest 1, Midwest 2, and East) used standard clinical microbiology techniques to identify and collect all extended-spectrum cephalosporin-resistant (ESC-R) *E. coli* collected from urine or other normally sterile sites during routine clinical care of both inpatient and outpatient children < 22 years of age. ESC-R isolates were defined as those non-susceptible to ceftriaxone, cefotaxime, ceftazidime, cefepime, or aztreonam. Patients could contribute multiple ESC-R isolates if the subsequent isolate was collected  $\geq 15$  days after the previous ESC-R isolate. For each resistant isolate, three consecutive *E. coli* isolates that were susceptible to the aforementioned agents, referred to here as extended-spectrum cephalosporin-susceptible (ESC-S) isolates, were collected without respect to any patient or microbiological characteristics beyond temporal proximity to the ESC-R isolates and prior enrollment in the study (patients could only contribute one ESC-S isolate). Demographic and clinical data were collected from the medical records; methods for categorizing underlying medical conditions, capturing antibiotic

exposure, and characterizing the clinical significance of urine isolates (likely UTI vs. not) were described previously.[21,22] The Institutional Review Board at each hospital approved the study protocol.

## **Laboratory methods**

Methods for antibiotic susceptibility testing and typing of resistance phenotypes and determinants were described previously.[21] Briefly, ESC-R phenotypes (ESBL vs. AmpC) were characterized using a combination of disk diffusion and E-tests. Genetic determinants of extended-spectrum cephalosporin resistance were identified by PCR using primers for genes encoding common extended-spectrum cephalosporinases.[21] *H30* isolates were identified using the *fumC/fimH* genotyping scheme.[23] Isolates belonging to the *H30Rx* sublineage were identified by PCR detection of sublineage-specific single nucleotide polymorphisms.[7]

## **Statistical analyses**

### Prevalence estimates

The period prevalence of *H30* was estimated by calculating a weighted average of the ESC-R and ESC-S stratum-specific prevalence estimates (details in Supplementary Methods).

### Host correlates of infection

Only the first isolate from each unique individual was considered in the host factor analyses. Host factors were compared between patients with *H30* vs. non-*H30* isolates, stratified by ESC-R status and adjusting for study hospital where sample size allowed. The magnitude of the association between each predictor of interest and *H30* infection was then assessed using univariable and multivariable log-binomial regression models. For each predictor of interest, the relative risk (RR) and 95% confidence intervals (CIs) from three models are presented: 1) a univariable model that estimates the crude (unadjusted) total effect of the predictor of interest on the outcome; 2) a multivariable model that estimates the total effect of the predictor of interest

on the outcome, adjusted for potential confounders; and 3) a multivariable model that estimates the direct effect of the predictor of interest on the outcome, adjusted for potential confounders as well as for potential mediators. All multivariable models adjusted for study hospital; additional potential confounders and mediators were selected according to the conceptual frameworks found in the supplementary material (Figures S3 & S4). Finally, we conducted *post-hoc* analyses of the interaction between age and underlying medical condition (details in Supplementary Methods).

### Antimicrobial resistance characteristics

We examined co-resistance to commonly used antimicrobial agents in the first *E. coli* isolate collected per individual, stratifying by ESC-R and ESC-S status to maintain consistency with the sampling scheme of the parent study. *H30* isolates were additionally stratified into *H30Rx* and *H30-non-Rx* (Figure S1) and compared to non-*H30* isolates. Among ESC-R isolates, ESC-R-associated resistance mechanisms and determinants were also identified and compared. All analyses were conducted using R version 3.3.1 (R Core Team, 2016).

## **RESULTS**

### **Isolates and prevalence estimates**

A total of 339 ESC-R isolates from 278 patients and 1008 ESC-S isolates from 1008 patients were available for analyses (Figure S2). The estimated prevalence of *H30* among all clinical *E. coli* isolates at all study hospitals was 5.3% (95% CI 4.6%-7.1%), while the hospital-specific prevalence ranged from 2.7% to 6.2% (Figure 1). The estimated overall prevalence of *H30Rx* was 0.87% (95% CI 0.70%-1.7%).

### **Host correlates of infection by ESC-R status**

The first ESC-R isolate from each of the 278 patients with an ESC-R isolate collected during the study period was included in the host correlates analyses (Figure S2). Among these patients, patient age was associated with *H30* infection and further examined as a predictor of interest (Table 1). Our sample size precluded multilevel predictors, so age was categorized into ages 0-5 versus 6-21 years in regression models. After adjusting for potential confounders, age 0-5 was associated with an 83% increased risk of the infecting organism being *H30* (RR 1.83, 95%CI 1.19-2.83). There was no evidence that this association was mediated through factors related to underlying illness, or that underlying illness interacted with age (Table 3 and Table S3). When restricting the outcome to *H30Rx* infection only (vs. non-*H30* infection) and adjusting for potential confounders, the effect size was stronger (RR 2.25, 95%CI 1.33-3.80).

A total of 1008 patients had one ESC-S isolate collected during the study period. Among these patients, patient age and several factors associated with underlying illness were associated with *H30* infection (Table 1). Each of these variables was examined as a predictor of interest except for: (i) history of transplantation, due to small numbers, and (ii) type of infection acquisition, since previous hospitalization and underlying medical conditions were examined independently. Underlying medical condition and indwelling device categories were collapsed into any vs. none. Patient age  $\leq 5$  years was negatively associated with *H30* infection (RR 0.48, 95% CI 0.27-0.87). Of the variables related to underlying illness, after adjusting for potential confounders, only presence of an underlying medical condition (RR 4.49, 95%CI 2.43-8.31) remained as an independent predictor of *H30* infection; results were very similar when analyzing presence of an underlying urologic condition only (Table S4). When including potential mediators in the models, the magnitude of the associations between age  $\leq 5$  years and presence of an underlying medical condition with *H30* infection decreased, but the associations remained statistically significant (Table 3). Evidence of interaction between age and underlying medical condition was observed; when examining joint effects, underlying medical condition was only significantly

associated with *H30* infection in combination with older age, and older age was only significantly associated with *H30* infection in combination with presence of an underlying medical condition (Table 4).

Since patient age was important in the analyses of both ESC-R and ESC-S isolates, we also visually inspected the distributional differences of age measured continuously. While the non-*H30* age distributions are very similar, the *H30* age distributions display marked differences between ESC-R and ESC-S isolates (Figure 2).

### **Antimicrobial resistance characteristics by ESC-R and *H30Rx* status**

A total of 278 ESC-R isolates were examined (the first isolate collected per individual). Among these isolates, nearly all *H30Rx* and *H30*-non-*Rx* isolates were non-susceptible to fluoroquinolones, compared to less than half of non-*H30* isolates (Table 2). Similarly, all ESC-R *H30Rx* and the vast majority of *H30*-non-*Rx* isolates were ESBL-producing, while non-*H30* isolates were more evenly split between ESBL producers and AmpC producers. *H30* was the most common subclone identified among the ESC-R isolates in the study (Table S1); it made up 29.9% (83/278) of ESC-R isolates, and when restricting to ESBL-producing isolates only, it made up 43.3% (81/187) of the total. The vast majority of ESBL-producing *H30Rx* isolates had a CTX-M-15 beta-lactamase, while ESBL-producing *H30*-non-*Rx* isolates were dominated by the CTX-M-27 beta-lactamase; ESBL-producing non-*H30* isolates were more evenly split between CTX-M-15 and CTX-M-14 beta-lactamases (Table 2). Systematic differences in the types of ESC-R resistance determinants by study hospital or year were not observed (Figure S5).



Among the 1008 ESC-S isolates examined, fluoroquinolone non-susceptibility was dominant among *H30* isolates, while only a small fraction of non-*H30* ESC-S isolates were non-susceptible to fluoroquinolones (Table 2).

## DISCUSSION

We utilized a multiyear, multicenter case-control study of extraintestinal *E. coli* infections in children's hospitals to address a critical knowledge gap about the epidemiology of the globally important ST131-*H30* subclone among US children. Our results can be summarized into three main findings. First, the estimated prevalence of *H30* among pediatric extraintestinal *E. coli* isolates of 5.3% was lower than the 10-20% that has been observed in US adults.[6,14,15] However, *H30* was nearly as dominant among ESBL-producing isolates in children (43.3%) as has been reported in adults (about 50%).[16,17] Second, patient age was associated with infection due to *H30*, and the nature of this association contrasted sharply between ESC-R and ESC-S infections. Among ESC-R infections, *H30* was associated with young age ( $\leq 5$  years), while among ESC-S infections, *H30* was associated with older age (6-21 years), as well as with the presence of an underlying medical condition. Third, the antimicrobial resistance characteristics of *H30* and *H30Rx* collected from children were consistent with what has been previously reported.[12,16–18,24] ESC-R *H30* isolates were almost always fluoroquinolone-resistant and ESBL-producing, and ESBL-producing *H30Rx* isolates were associated with the CTX-M-15 beta-lactamase, while ESBL-producing *H30*-non-*Rx* isolates were associated with the CTX-M-27 beta-lactamase.

Other studies have suggested that *H30* is less prevalent among children than adults; however, very few pediatric isolates were included in these studies.[15,16] Interestingly, we observed that *H30* was nearly as dominant among ESBL-producing *E. coli* infections in children as has been reported in adults.[16,17] These findings are consistent with a recent study from a pediatric

setting conducted in the Midwestern US.[25] However, in the context of all clinical extraintestinal *E. coli* infections, ESBL-producing organisms are still relatively rare in both adults and children. The bulk of the *H30* isolates circulating in the population are non-ESBL-producing but fluoroquinolone-resistant, and these isolates were much less common in our study than has been observed in adult populations.[15,16] This observation may be explained by differential antibiotic use in these populations. Fluoroquinolones are infrequently prescribed to children due to concerns about toxicity;[26] in our study, about 5% of patients received fluoroquinolones in the year before collection of their first isolate, while 46% of patients received any antibiotic in that same time period (Figure S6). Lower rates of fluoroquinolone use likely translate to less selective pressure on fluoroquinolone-resistant organisms such as *H30*. Interestingly, a recent study conducted in adults in Australia and New Zealand, a population that also has low rates of fluoroquinolone use, reported an overall prevalence of *H30* of 3.5%, but a prevalence of *H30* among ESC-R *E. coli* of 39%, which is similar to our findings.[27]

The association we identified between *H30* and young age among ESC-R isolates is consistent with the findings of a recent longitudinal study showing that among children, the prevalence of ESBL-producing *Enterobacteriaceae* was highest and increasing most rapidly in children aged 1-5.[28] Why *H30/H30Rx* is more frequently found among young children with ESC-R infections compared to older children with ESC-R infections, as well as where young children are acquiring this pathogen, deserves further investigation. Previous studies have portrayed *H30* as an opportunistic pathogen that favors compromised hosts including the elderly,[14] and young children's developing immune systems could be associated with *H30* infection. Maternal infection or colonization may also play a role; a recent study found *H30* colonization during the first several years of life of healthy twins was associated with the mother also being colonized, however, none of these *H30* isolates were ESBL-producing.[29] Finally, while transmission of *H30* between children within healthcare facilities has not been documented, there are reports of

transmission of, and persistent colonization with, *H30/H30Rx* among healthy children within daycares and households.[29–32] Future studies might focus on systematic sampling in the community setting in order to better elucidate the reservoirs and transmission dynamics of *H30/H30Rx* among young children.

The association we observed between ESC-S *H30* infections and older children is not consistent with the limited existing data.[15,33]. Our *post-hoc* interaction analyses suggest that age and underlying illness interact, with the strongest risk of an infection being *H30* observed in older children with underlying medical conditions. We hypothesize that these observed associations could be driven by different selective pressures in older, less healthy children: specifically, fluoroquinolones are likely prescribed more frequently to older children than younger children due to less concern about toxicity. This prescribing pattern was borne out in our data; the median age was 12.6 years among patients that received fluoroquinolones in the year prior to their infection, whereas the median age among those that received any antibiotic was 6 years (Figure S6). A more refined examination of the role of antibiotic exposure, specifically focusing on fluoroquinolones, is warranted.

Notably, previous studies conducted in adult populations have described *H30* as being associated with healthcare contact and compromised hosts,[14,15] however, we found those associations only among ESC-S *H30* infections. The fact that we observed these patterns among ESC-S isolates is not surprising; compromised hosts and healthcare contact are consistently associated with antimicrobial resistant infections,[34] and as is shown in Table 2, *H30* isolates are more antimicrobial-resistant than other ESC-S isolates. However, we observed that when compared to other ESC-R organisms, there is no evidence of an association between *H30* and underlying illness. This observation raises the question of whether some host correlates observed in previous studies are specific to the *H30* subclone, or just reflect risk

factors for MDR extraintestinal *E. coli* in general. Future studies should consider comparing *H30* to other MDR *E. coli* where possible.

A number of limitations need to be considered in the interpretation of these data. First, because of the case-control design of the parent study, the prevalence of *H30* and *H30Rx* among clinical *E. coli* isolates could not be calculated directly. However, we believe the assumptions employed in our prevalence estimates are reasonable, and that these data provide the best estimate of the prevalence of *H30* in children to date. The design of the parent study was also a strength, as it allowed us to enrich the collection with the less common MDR isolates and examine risk factors for infection with *H30* among those with ESC-R *E. coli* isolates specifically. Second, because this study was an exploratory investigation of an existing dataset, all findings should be interpreted cautiously; there could be residual confounding due to unmeasured or incompletely measured variables, spurious associations identified due to multiple testing, or missed associations due to lack of power. To mitigate this, we attempted to make thoughtful model building decisions and interpretations by using conceptual models rather than taking a purely data-driven approach. Third, the isolates did not undergo multilocus sequence-typing (MLST) or other molecular characterization relevant to *H30* such as typing of the *gyrA* and *parC* alleles. However, the *H30* isolates in this study have since undergone whole genome sequencing, and *in silico* MLST analyses have confirmed that isolates classified as *H30* are ST131 (data not shown). Finally, although this was a multicenter study, our data were collected from freestanding children's hospitals between 2009 and 2013, so the results may not be generalizable to other settings, and epidemiologic patterns may have shifted during the subsequent several years. Despite these limitations, this study significantly improves our understanding of the impact of *H30* in children, and is one of the most robust examinations of the clinical burden of, and risk factors for, *H30* infections to date.

## Conclusion

Although *E. coli* ST131-*H30* is not as prevalent among children as has been reported in adults, perhaps as a result of low rates of fluoroquinolone use in pediatrics, this clone is dominant among ESC-R extraintestinal *E. coli* infections in children. In particular, ESBL-producing *H30*, dominated by the *H30Rx* subclone, disproportionately affect young children relative to other ESC-R *E. coli*, even when accounting for other underlying host factors. More densely sampled studies are needed to elucidate the reservoirs and transmission dynamics of this difficult-to-treat pathogen in a pediatric population.

## **FUNDING**

Research reported in this publication was supported by the National Institutes of Health via the National Institute for Allergies and Infectious Diseases [grant number R01AI083413], and via the National Center for Advancing Translational Sciences [grant number TL1TR000422]. The content is solely the responsibility of the authors and does not necessarily represent the official views of the National Institutes of Health.

## **CONFLICTS OF INTEREST**

E.V.S and V.T have patent applications to detect *E. coli* strains. E.V.S is a major shareholder in IDGenomics, Inc. The other authors report no conflicts of interest.

## **ACKNOWLEDGEMENTS**

The authors thank Carey-Ann Burnham, Alexis Elward, Jason Newland, Rangaraj Selvarangan, Kaede Sullivan, Theoklis Zaoutis, and Xuan Qin for their provision of bacterial isolates and associated clinical data. Additionally, they thank Jeff Myers and Huxley Smart for their assistance with molecular typing of isolates.



## REFERENCES

1. World Health Organization. Antimicrobial resistance: global report on surveillance. Available at: <http://www.who.int/drugresistance/documents/surveillancereport/en/>. Accessed 15 April 2015.
2. Johnson JR, Nicolas-Chanoine MH, Deb Roy C, et al. Comparison of Escherichia coli ST131 pulsotypes, by epidemiologic traits, 1967-2009. *Emerg Infect Dis*, **2012**; 18:598–607.
3. Nicolas-Chanoine M-H, Blanco J, Leflon-Guibout V, et al. Intercontinental emergence of Escherichia coli clone O25:H4-ST131 producing CTX-M-15. *J Antimicrob Chemother*, **2008**; 61:273–81.
4. Johnson JR, Johnston B, Clabots C, Kuskowski MA, Castanheira M. Escherichia coli sequence type ST131 as the major cause of serious multidrug-resistant E. coli infections in the United States. *Clin Infect Dis*, **2010**; 51:286–294.
5. Mathers AJ, Peirano G, Pitout JDD. Escherichia coli ST131: The Quintessential Example of an International Multiresistant High-Risk Clone. *Adv Appl Microbiol*, **2015**; 90:109 – 154.
6. Johnson JR, Tchesnokova V, Johnston B, et al. Abrupt emergence of a single dominant multidrug-resistant strain of Escherichia coli. *J Infect Dis*, **2013**; 207:919–928.
7. Price LB, Johnson JR, Aziz M, et al. The epidemic of extended-spectrum- $\beta$ -lactamase-producing Escherichia coli ST131 is driven by a single highly pathogenic subclone, H30-Rx. *MBio*, **2013**; 4:e00377-13.
8. Petty NK, Ben Zakour NL, Stanton-Cook M, et al. Global dissemination of a multidrug resistant Escherichia coli clone. *Proc Natl Acad Sci USA*, **2014**; 111:5694–9.
9. Johnson JR, Porter S, Thuras P, Castanheira M. Epidemic Emergence in the United States of Escherichia coli Sequence Type 131-H30, 2000-2009. *Antimicrob Agents Chemother*, **2017**; Advanced online publication: doi:10.1128/AAC.00732-17.

10. Stoesser N, Sheppard AE, Pankhurst L, et al. Evolutionary History of the Global Emergence of the Escherichia coli Epidemic Clone ST131. *MBio*, **2016**; 7:e02162-15.
11. Ben Zakour NL, Alsheikh-Hussain AS, Ashcroft MM, et al. Sequential acquisition of virulence and fluoroquinolone resistance has shaped the evolution of Escherichia coli ST131. *MBio*, **2016**; 7:1–12.
12. Matsumura Y, Pitout JDD, Gomi R, et al. Global Escherichia coli Sequence Type 131 Clade with bla CTX-M-27 Gene. *Emerg Infect Dis*, **2016**; 22:1900–1907.
13. Baquero F, Tedim AP, Coque TM. Antibiotic resistance shaping multi-level population biology of bacteria. *Front Microbiol*, **2013**; 4:1–15.
14. Johnson JR, Thuras P, Johnston BD, et al. The Pandemic H 30 Subclone of Escherichia coli Sequence Type 131 (ST131) is Associated with Persistent Infections and Adverse Outcomes Independent from Its Multi-Drug Resistance and Associations with Compromised Hosts. *Clin Infect Dis*, **2016**; 62:1529–1536.
15. Banerjee R, Johnston B, Lohse C, et al. The clonal distribution and diversity of extraintestinal Escherichia coli isolates vary according to patient characteristics. *Antimicrob Agents Chemother*, **2013**; 57:5912–5917.
16. Drawz SM, Porter S, Kuskowski M a., et al. Variation in resistance traits, phylogenetic background, and virulence genotypes among Escherichia coli clinical isolates from adjacent hospital campuses serving distinct patient populations. *Antimicrob Agents Chemother*, **2015**; 59:5331–5339.
17. Banerjee R, Robicsek A, Kuskowski M a., et al. Molecular epidemiology of Escherichia coli sequence type 131 and its H30 and H30-Rx subclones among extended-spectrum- $\beta$ -lactamase-positive and -negative E. coli clinical isolates from the Chicago region, 2007 to 2010. *Antimicrob Agents Chemother*, **2013**; 57:6385–6388.
18. Peirano G, Pitout JDD. Fluoroquinolone-resistant Escherichia coli sequence type 131 isolates causing bloodstream infections in a canadian region with a centralized laboratory

- system: rapid emergence of the H30-Rx sublineage. *Antimicrob Agents Chemother*, **2014**; 58:2699–703.
19. Shaikh N, Ewing AL, Bhatnagar S, Hoberman A. Risk of Renal Scarring in Children With a First Urinary Tract Infection: A Systematic Review. *Pediatrics*, **2010**; 126:1084–1091.
  20. Jacobson SH, Eklöf O, Eriksson CG, Lins LE, Tidgren B, Winberg J. Development of hypertension and uraemia after pyelonephritis in childhood: 27 year follow up. *BMJ*, **1989**; 299:703–6.
  21. Zerr DM, Miles-Jay A, Kronman MP, et al. Previous antibiotic exposure increases risk of infection with extended spectrum beta lactamase- and AmpC-producing *Escherichia coli* and *Klebsiella pneumoniae* in pediatric patients. *Antimicrob Agents Chemother*, **2016**; 60:4237–4243.
  22. Das S, Adler AL, Miles-Jay A, et al. Antibiotic prophylaxis is associated with subsequent resistant infections in children with an initial extended-spectrum cephalosporin-resistant *Enterobacteriaceae* infection. *Antimicrob Agents Chemother*, **2017**; 61:e02656-16.
  23. Weissman SJ, Johnson JR, Tchesnokova V, et al. High-resolution two-locus clonal typing of extraintestinal pathogenic *Escherichia coli*. *Appl Environ Microbiol*, **2012**; 78:1353–1360.
  24. Olesen B, Frimodt-Moller J, Leihof RF, et al. Temporal Trends in Antimicrobial Resistance and Virulence-Associated Traits within the *Escherichia coli* Sequence Type 131 Clonal Group and Its H30 and H30-Rx Subclones, 1968 to 2012. *Antimicrob Agents Chemother*, **2014**; 58:6886–6895.
  25. Logan LK, Hujer AM, Marshall SH, et al. Analysis of  $\beta$ -Lactamase Resistance Determinants in *Enterobacteriaceae* from Chicago Children: A Multicenter Survey. *Antimicrob Agents Chemother*, **2016**; 60: 3462–3469.
  26. Bradley JS, Jackson M a. The Use of Systemic and Topical Fluoroquinolones. *Pediatrics* **2011**; 128:e1034–e1045.

27. Rogers BA, Ingram PR, Runnegar N, et al. Sequence type 131 fimH30 and fimH41 subclones amongst *Escherichia coli* isolates in Australia and New Zealand. *Int J Antimicrob Agents*, **2015**; 45:351–358.
28. Logan LK, Braykov NP, Weinstein RA., Laxminarayan R. Extended-Spectrum  $\beta$ -Lactamase-Producing and Third-Generation Cephalosporin-Resistant Enterobacteriaceae in Children: Trends in the United States, 1999-2011. *J Pediatric Infect Dis Soc*, **2014**; 3:320-328.
29. Gurnee EA., Ndao IM, Johnson JR, et al. Gut Colonization of Healthy Children and Their Mothers With Pathogenic Ciprofloxacin-Resistant *Escherichia coli*. *J Infect Dis*, **2015**; 212:1862–1868.
30. Madigan T, Johnson JR, Clabots C, et al. Extensive Household Outbreak of Urinary Tract Infection and Intestinal Colonization due to Extended-Spectrum  $\beta$  -Lactamase-Producing *Escherichia coli* Sequence Type 131. *Clin Infect Dis*, **2015**; 61:e5–e12.
31. Blanc V, Leflon-Guibout V, Blanco J, et al. Prevalence of day-care centre children (France) with faecal CTX-M-producing *Escherichia coli* comprising O25b:H4 and O16:H5 ST131 strains. *J Antimicrob Chemother*, **2014**; 69:1231–1237.
32. Johnson JR, Davis G, Clabots C, et al. Household Clustering of *Escherichia coli* Sequence Type 131 Clinical and Fecal Isolates According to Whole Genome Sequence Analysis. *Open Forum Infect Dis*, **2016**; 3:ofw129.
33. Banerjee R, Johnston B, Lohse C, Porter SB, Clabots C, Johnson JR. *Escherichia coli* Sequence Type 131 is a Dominant, Antimicrobial-Resistant Clonal Group Associated with Healthcare and Elderly Hosts. *Infect Control Hosp Epidemiol*, **2013**; 34:361–9.
34. Safdar N, Maki DG. The Commonality of Risk Factors for Nosocomial Colonization and. *Ann Intern Med*, **2002**; 136:834–844.

## TABLES

**Table 1: Selected demographic and clinical characteristics of patients with *H30* and non-*H30* isolates, stratified by extended-spectrum cephalosporin resistance status**

|                                                       | ESC-R<br>n=278     |                          |                          | ESC-S<br>n=1008    |                          |                          |
|-------------------------------------------------------|--------------------|--------------------------|--------------------------|--------------------|--------------------------|--------------------------|
|                                                       | <i>H30</i><br>n=83 | non- <i>H30</i><br>n=195 | p-<br>value <sup>a</sup> | <i>H30</i><br>n=47 | non- <i>H30</i><br>n=961 | p-<br>value <sup>a</sup> |
| <b>Age (years)</b>                                    |                    |                          | 0.008*                   |                    |                          | <0.001*                  |
| 0-5                                                   | 60 (72.3)          | 98 (50.3)                |                          | 16 (34.0)          | 504 (52.5)               |                          |
| 6-10                                                  | 10 (12.1)          | 40 (20.5)                |                          | 4 (8.5)            | 190 (19.8)               |                          |
| 11-15                                                 | 6 (7.2)            | 31 (15.9)                |                          | 12 (25.5)          | 126 (13.1)               |                          |
| 16-21                                                 | 7 (8.4)            | 26 (13.3)                |                          | 15 (31.9)          | 141 (14.7)               |                          |
| <b>Sex</b>                                            |                    |                          | 0.407                    |                    |                          | 0.440                    |
| Male                                                  | 18 (21.7)          | 53 (27.2)                |                          | 8 (17.0)           | 130 (13.5)               |                          |
| Female                                                | 65 (78.3)          | 142 (72.8)               |                          | 39 (83.0)          | 831 (86.5)               |                          |
| <b>Ethnicity<sup>b</sup></b>                          |                    |                          | 0.110                    |                    |                          | 0.312                    |
| Hispanic                                              | 8 (10.0)           | 36 (19.3)                |                          | 4 (8.9)            | 135 (14.6)               |                          |
| Non-Hispanic                                          | 72 (90.0)          | 151 (80.7)               |                          | 41 (91.1)          | 791 (85.4)               |                          |
| <b>Race<sup>b,c</sup></b>                             |                    |                          | 0.087                    |                    |                          | 0.314                    |
| White/Caucasian                                       | 39 (49.4)          | 116 (62.0)               |                          | 29 (63.0)          | 629 (68.2)               |                          |
| African-American                                      | 12 (15.2)          | 29 (15.5)                |                          | 12 (26.1)          | 219 (23.7)               |                          |
| Asian                                                 | 22 (27.9)          | 32 (17.1)                |                          | 2 (4.4)            | 51 (5.5)                 |                          |
| Native American                                       | 4 (5.1)            | 2 (1.1)                  |                          | 1 (2.2)            | 6 (0.7)                  |                          |
| Pacific Islander                                      | 2 (2.5)            | 7 (3.7)                  |                          | 1 (2.2)            | 10 (1.1)                 |                          |
| More than one race                                    | 0 (--)             | 1 (0.5)                  |                          | 1 (2.2)            | 8 (0.9)                  |                          |
| <b>Site of culture</b>                                |                    |                          | 0.233                    |                    |                          | 0.753                    |
| Urine <sup>c,d</sup>                                  | 78 (94.0)          | 173 (88.7)               |                          | 45 (95.7)          | 923 (96.1)               |                          |
| Blood                                                 | 2 (2.4)            | 15 (7.7)                 |                          | 2 (4.3)            | 32 (3.3)                 |                          |
| Other                                                 | 3 (3.6)            | 7 (3.6)                  |                          | 0 (0.0)            | 6 (0.6)                  |                          |
| <b>Type of acquisition<sup>b,e</sup></b>              |                    |                          | 0.832                    |                    |                          | <0.001*                  |
| Community-associated                                  | 28 (33.7)          | 65 (33.3)                |                          | 14 (29.8)          | 599 (62.7)               |                          |
| Healthcare-associated                                 | 45 (54.2)          | 103 (52.8)               |                          | 30 (63.8)          | 297 (31.1)               |                          |
| Hospital-associated                                   | 10 (12.0)          | 27 (13.8)                |                          | 3 (6.4)            | 60 (6.3)                 |                          |
| <b>Hospitalized in past 6 months<sup>b</sup></b>      |                    |                          | 0.429                    |                    |                          | 0.017*                   |
| Yes                                                   | 25 (30.1)          | 69 (35.4)                |                          | 13 (27.7)          | 143 (15.0)               |                          |
| No                                                    | 58 (69.9)          | 126 (64.6)               |                          | 34 (72.3)          | 813 (85.0)               |                          |
| <b>Underlying medical condition<sup>b</sup></b>       |                    |                          | 0.854                    |                    |                          | <0.001*                  |
| Urologic <sup>f</sup>                                 | 30 (36.1)          | 75 (38.7)                |                          | 26 (55.3)          | 185 (19.3)               |                          |
| Malignancy                                            | 4 (4.8)            | 13 (6.7)                 |                          | 1 (2.1)            | 26 (2.7)                 |                          |
| Other condition                                       | 16 (19.3)          | 35 (18.0)                |                          | 6 (12.8)           | 104 (10.8)               |                          |
| No condition                                          | 33 (39.8)          | 71 (36.6)                |                          | 14 (29.8)          | 644 (67.2)               |                          |
| <b>Antibiotic use in the past 30 days<sup>b</sup></b> |                    |                          | 0.548                    |                    |                          | 0.006*                   |
| Yes                                                   | 34 (41.0)          | 85 (43.6)                |                          | 16 (34.0)          | 176 (18.4)               |                          |
| No                                                    | 49 (59.0)          | 110 (56.4)               |                          | 31 (66.0)          | 781 (81.6)               |                          |

|                                                               |           |            |       |           |            |         |
|---------------------------------------------------------------|-----------|------------|-------|-----------|------------|---------|
| <b>History of transplantation<sup>b</sup></b>                 |           |            | 0.108 |           |            | <0.001* |
| Yes                                                           | 3 (3.6)   | 19 (9.7)   |       | 5 (10.6)  | 22 (2.3)   |         |
| No                                                            | 80 (96.4) | 175 (90.2) |       | 42 (89.4) | 937 (97.7) |         |
| <b>Received immunosuppressants in last year<sup>b,g</sup></b> |           |            | 0.100 |           |            | 0.071   |
| Yes                                                           | 9 (10.8)  | 37 (19.1)  |       | 6 (12.8)  | 62 (6.5)   |         |
| No                                                            | 74 (89.2) | 157 (80.9) |       | 41 (87.2) | 897 (93.5) |         |
| <b>Device type</b>                                            |           |            | 0.157 |           |            | <0.001* |
| Central venous catheter                                       | 7 (8.4)   | 28 (14.4)  |       | 3 (6.4)   | 53 (5.5)   |         |
| Foley catheter                                                | 6 (7.2)   | 5 (2.6)    |       | 3 (6.4)   | 11 (1.1)   |         |
| Other device                                                  | 14 (16.9) | 26 (13.3)  |       | 10 (21.3) | 55 (5.7)   |         |
| No device                                                     | 56 (67.5) | 136 (69.7) |       | 31 (66.0) | 842 (87.6) |         |
| <b>Hospital</b>                                               |           |            | 0.156 |           |            | 0.349   |
| West                                                          | 22 (26.5) | 78 (40.0)  |       | 13 (27.7) | 341 (35.5) |         |
| East                                                          | 24 (28.9) | 51 (26.2)  |       | 16 (34.0) | 284 (29.6) |         |
| Midwest 1                                                     | 11 (13.3) | 23 (11.8)  |       | 3 (6.4)   | 108 (11.2) |         |
| Midwest 2                                                     | 26 (31.3) | 43 (22.1)  |       | 15 (31.9) | 228 (23.7) |         |

<sup>a</sup> P-values generated via Mantel-Haenzel chi-square tests (adjusting for study hospital) unless

otherwise indicated <sup>b</sup> Number does not add to n because of missing data. <sup>c</sup> P-values generated via

(unadjusted) Fisher's Exact test. <sup>d</sup> 99% of isolates collected from urine were characterized as likely

UTI. <sup>e</sup> Type of acquisition was defined as follows: community associated, culture obtained in an

outpatient setting or < 48 hours after hospital admission from an otherwise healthy patient without

hospitalization in the previous 6 months; healthcare associated, culture obtained in an outpatient

setting or < 48 hours after hospital admission from a patient who had been hospitalized in the

previous 6 months and/or had a chronic medical condition requiring frequent health care or

prolonged/recurrent antibiotic courses; and hospital associated, culture obtained > 48 hours after

hospital admission or < 48 hours after hospital discharge from a patient without signs or symptoms of

infection on admission <sup>f</sup> Diagnoses included in the urologic category are congenital urological

abnormality, neurogenic bladder, and vesicoureteral reflux. <sup>g</sup> Immunosuppressants included

antineoplastic agents, high-dose glucocorticoids ( $\geq 2\text{mg/kg}$  of body weight), tumor necrosis factor

inhibitors, calcineurin inhibitors, and mycophenolate mofetil. \* p-value < 0.05

**Table 2: Selected antimicrobial resistance characteristics of *H30*Rx, *H30*-non-Rx, and non-*H30* isolates stratified by extended-spectrum cephalosporin resistance status**

|                                      | ESC-R<br>n=278         |                       |                         |                                            |               | ESC-S<br>n=1008      |                       |                         |                                            |               |
|--------------------------------------|------------------------|-----------------------|-------------------------|--------------------------------------------|---------------|----------------------|-----------------------|-------------------------|--------------------------------------------|---------------|
|                                      | <i>H30</i><br>n = 83   |                       | <i>non-H30</i><br>n=195 | p-value vs. non- <i>H30</i> : <sup>a</sup> |               | <i>H30</i><br>n = 47 |                       | <i>non-H30</i><br>n=961 | p-value vs. non- <i>H30</i> : <sup>a</sup> |               |
|                                      | Rx<br>n=64             | <i>non-Rx</i><br>n=19 |                         | Rx                                         | <i>non-Rx</i> | Rx<br>n=5            | <i>non-Rx</i><br>n=42 |                         | Rx                                         | <i>non-Rx</i> |
| <b>Co-resistance</b>                 |                        |                       |                         |                                            |               |                      |                       |                         |                                            |               |
| Ciprofloxacin                        | 62 (96.9)              | 18 (94.7)             | 76 (39.0)               | <0.001*                                    | <0.001*       | 5 (100)              | 36 (85.7)             | 25 (2.6)                | <0.001*                                    | <0.001*       |
| Gentamicin                           | 28 (43.8)              | 6 (31.6)              | 73 (37.4)               | 0.453                                      | 0.798         | 0 (--)               | 13 (31.0)             | 34 (3.5)                | 1.00                                       | <0.001*       |
| TMP/SMX <sup>b</sup>                 | 43 (67.2)              | 15 (78.9)             | 121 (62.1)              | 0.555                                      | 0.226         | 1 (20.0)             | 26 (61.9)             | 240 (25.0)              | 1.00                                       | <0.001*       |
| TMP/SMX & ciprofloxacin              | 41 (64.1)              | 15 (78.9)             | 64 (32.8)               | <0.001*                                    | <0.001*       | 1 (20.0)             | 23 (54.8)             | 15 (1.6)                | 0.080                                      | <0.001*       |
| All three                            | 19 (29.7)              | 5 (26.3)              | 36 (18.5)               | 0.084                                      | 0.374         | 0 (--)               | 8 (19.0)              | 2 (0.2)                 | 1.00                                       | <0.001*       |
| <b>ESC-R type</b>                    |                        |                       |                         | <0.001*                                    | 0.007*        |                      |                       |                         |                                            |               |
| ESBL only                            | 64 (100) <sup>c</sup>  | 17 (89.5)             | 102 (52.6)              |                                            |               | --                   | --                    | --                      | --                                         | --            |
| AmpC only                            | 0 (--)                 | 2 (5.4)               | 88 (45.4)               |                                            |               | --                   | --                    | --                      | --                                         | --            |
| ESBL & AmpC                          | 0 (--)                 | 0 (--)                | 4 (2.06)                |                                            |               | --                   | --                    | --                      | --                                         | --            |
| Undetermined                         | 0 (--)                 | 0 (--)                | 1 (0.5)                 |                                            |               |                      |                       |                         |                                            |               |
| <b>ESBL determinants<sup>d</sup></b> | <b><u>n=64</u></b>     | <b><u>n=17</u></b>    | <b><u>n = 106</u></b>   |                                            |               |                      |                       |                         |                                            |               |
| CTX-M-15                             | 60 (93.8) <sup>c</sup> | 3 (17.6)              | 48 (45.3)               | <0.001*                                    | 0.060         | --                   | --                    | --                      | --                                         | --            |
| CTX-M-14                             | 0 (--)                 | 2 (11.8)              | 44 (41.5)               | <0.001*                                    | 0.037*        | --                   | --                    | --                      | --                                         | --            |
| CTX-M-27                             | 1 (1.6)                | 10 (58.8)             | 1 (0.9)                 | 1.000                                      | <0.001*       | --                   | --                    | --                      | --                                         | --            |
| CTX-M others                         | 0 (--)                 | 1 (5.3)               | 7 (6.6)                 | 0.046*                                     | 1.000         | --                   | --                    | --                      | --                                         | --            |
| ESBL SHV                             | 0 (--)                 | 0 (--)                | 3 (2.8)                 | 0.292                                      | 1.000         | --                   | --                    | --                      | --                                         | --            |
| ESBL TEM                             | 0 (--)                 | 0 (--)                | 0 (--)                  | --                                         | --            | --                   | --                    | --                      | --                                         | --            |
| None identified                      | 3 (4.7)                | 1 (5.3)               | 4 (3.8)                 | 1.000                                      | 0.531         | --                   | --                    | --                      | --                                         | --            |
| <b>AmpC determinants<sup>d</sup></b> | <b><u>n=0</u></b>      | <b><u>n=2</u></b>     | <b><u>n=92</u></b>      |                                            |               |                      |                       |                         |                                            |               |
| CMY-2                                | --                     | 1 (50.0)              | 79 (96.3)               | --                                         | 0.277         | --                   | --                    | --                      | --                                         | --            |
| DHA                                  | --                     | 0 (--)                | 2 (2.2)                 | --                                         | 1.000         | --                   | --                    | --                      | --                                         | --            |
| FOX                                  | --                     | 0 (--)                | 2 (2.2)                 | --                                         | 1.000         | --                   | --                    | --                      | --                                         | --            |
| None identified                      | --                     | 1 (50.0)              | 10 (10.9)               | --                                         | 1.000         | --                   | --                    | --                      | --                                         | --            |

<sup>a</sup> P-values generated via Chi-square test; Fisher's Exact test was used when expected frequencies were below 5. <sup>b</sup> TMP/SMX = trimethoprim-

sulfamethoxazole <sup>c</sup>One of these isolates had both a CTX-M-15 gene identified as well as a KPC-3 carbapenemase gene, and was resistant to

meropenem. <sup>d</sup>Total exceeds 100% as isolates could have more than one determinant identified. \* p-value < 0.05

**Table 3: Total and direct effect of selected factors on risk of H30 infection vs. infection with other *E. coli* types using log-binomial regression models stratified by extended-spectrum cephalosporin resistance status**

|                                         | ESC-R                       |                                |                                | ESC-S                         |                                |                                |
|-----------------------------------------|-----------------------------|--------------------------------|--------------------------------|-------------------------------|--------------------------------|--------------------------------|
|                                         | Total effect<br>RR (95% CI) |                                | Direct effect<br>RR (95% CI)   | Total effect<br>RR (95% CI)   |                                | Direct effect<br>RR (95% CI)   |
|                                         | Crude                       | Adjusted*                      | Adjusted*                      | Crude                         | Adjusted*                      | Adjusted*                      |
| <b>Age 0-5 years</b>                    | 1.98 (1.30-3.01)*           | 1.83 (1.19-2.83) <sup>a†</sup> | 1.91 (1.24-2.96) <sup>b†</sup> | 0.48 (0.27-0.87) <sup>†</sup> | --                             | 0.52 (0.29-0.94) <sup>c</sup>  |
| <b>Antibiotics in last 30 days</b>      | --                          | --                             | --                             | 2.18 (1.22-3.91) <sup>†</sup> | 1.18 (0.64-2.20) <sup>d</sup>  | --                             |
| <b>Underlying medical condition</b>     | --                          | --                             | --                             | 4.46 (2.42-8.21) <sup>†</sup> | 4.49 (2.43-8.31) <sup>e†</sup> | 3.53 (1.74-7.17) <sup>††</sup> |
| <b>Hospitalization in past 6 months</b> | --                          | --                             | --                             | 2.08 (1.12-3.84) <sup>†</sup> | 1.22 (0.65-2.30) <sup>g</sup>  | 1.01 (0.51-2.00) <sup>h</sup>  |
| <b>Presence of indwelling device</b>    | --                          | --                             | --                             | 3.33 (1.87-5.92) <sup>†</sup> | 1.54 (0.78-3.04) <sup>i</sup>  | 1.53 (0.77-3.01) <sup>c</sup>  |

\*All models adjusted for study hospital.

<sup>a</sup> Additional covariates: Asian race (yes/no).

<sup>b</sup> Additional covariates: Asian race (yes/no), underlying medical condition (yes/no), antibiotics in the last 30 days (yes/no), hospitalization in the past 6 months (yes/no).

<sup>c</sup> Additional covariates: underlying medical condition (yes/no), antibiotics in the last 30 days (yes/no), hospitalization in the past 6 months (yes/no).

<sup>d</sup> Additional covariates: age (0-5 or 6-21, hospitalization in the past 6 months (yes/no), underlying medical condition (yes/no), indwelling device (yes/no).

<sup>e</sup> Additional covariates: age (0-5 or 6-21).

<sup>f</sup> Additional covariates: age (0-5 or 6-21, hospitalization in the past 6 months (yes/no), antibiotics in the last 30 days (yes/no), indwelling device (yes/no).

<sup>g</sup> Additional covariates: age (0-5 or 6-21), underlying medical condition (yes/no).

<sup>h</sup> Additional covariates: age (0-5 or 6-21), underlying medical condition (yes/no), antibiotics in the last 30 days, indwelling device (yes/no).



---

<sup>i</sup> Additional covariates: underlying medical condition (yes/no), hospitalization in the past 6 months (yes/no).

<sup>†</sup> Confidence interval does not include 1.

**Table 4: Analysis of interaction between age and underlying medical condition on the risk of *H30* infection vs. infection with other *E. coli* types using log-binomial regression models**

|                                                                         | Age                                |                                    | RRs (95% CI)* for age 0-5 within strata of underlying medical condition |
|-------------------------------------------------------------------------|------------------------------------|------------------------------------|-------------------------------------------------------------------------|
|                                                                         | 0-5 years                          | 6-21 years                         |                                                                         |
| <b>Presence of an underlying medical condition</b>                      | RR (95% CI)*<br>2.80 (0.90 – 8.70) | RR (95% CI)*<br>8.66 (3.38 – 22.2) | 0.32 (0.14 – 0.72)                                                      |
| <b>No underlying medical condition</b>                                  | 1.52 (0.51 – 4.50)                 | 1.0 (ref)                          | 1.51 (0.50 – 4.53)                                                      |
| <b>RRs (95% CI)* for underlying medical condition within age strata</b> | 1.99 (0.74 – 5.33)                 | 8.81 (3.44 – 22.6)                 |                                                                         |

Interaction Contrast Ratio (ICR) (95% CI) = -6.38 (-23.5 – -1.15). When interpreting the ICR, deviation from 0

indicates evidence of interaction on the additive scale (see Supplementary Methods).

\*RRs adjusted for study hospital.

## FIGURE LEGENDS

**Figure 1: Estimated prevalence of ST131-*H30* among extraintestinal *E. coli* infections overall and by study hospital. ESC-R = extended-spectrum cephalosporin-resistant. ESC-S = extended-spectrum cephalosporin-susceptible. The raw numbers that generated these estimates can be found in Table S2.**

**Figure 2: Distributions of age (in years) by ST131-*H30* and non-ST131-*H30* status and extended-spectrum cephalosporin resistance status. ESC-R = extended-spectrum cephalosporin-resistant. ESC-S = extended-spectrum cephalosporin-susceptible.**

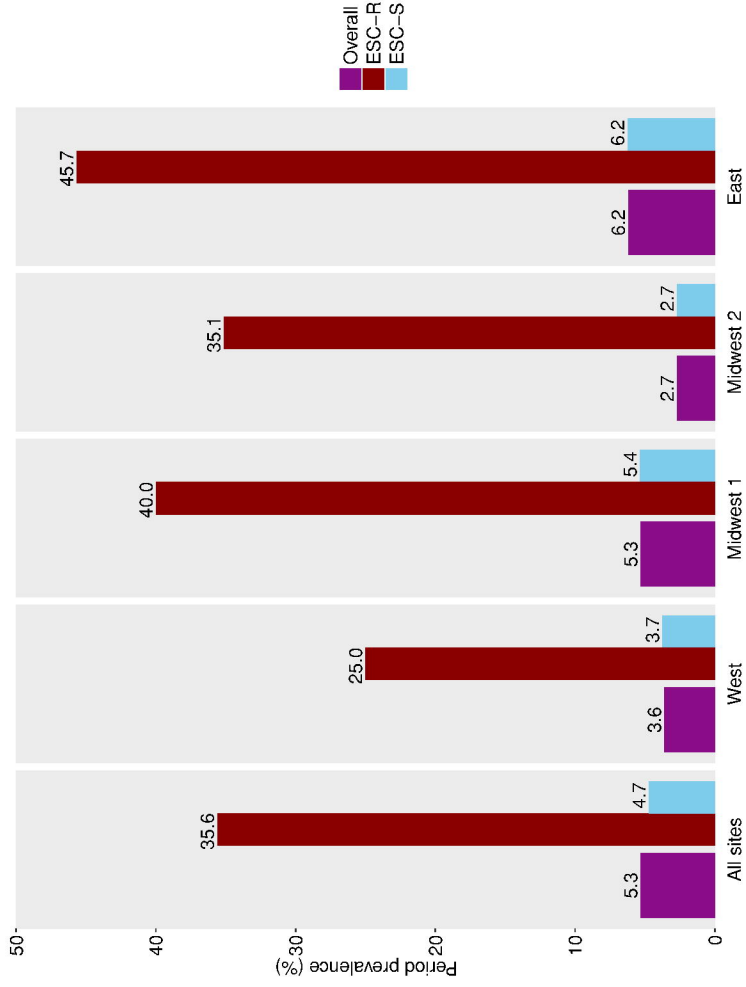

Non-H3O

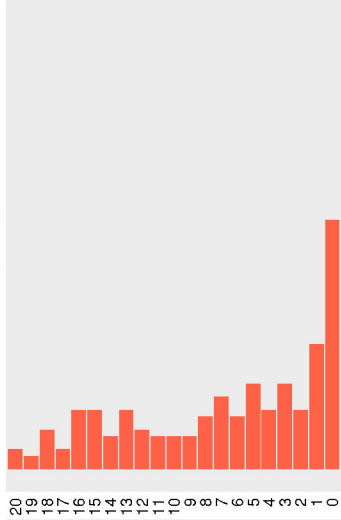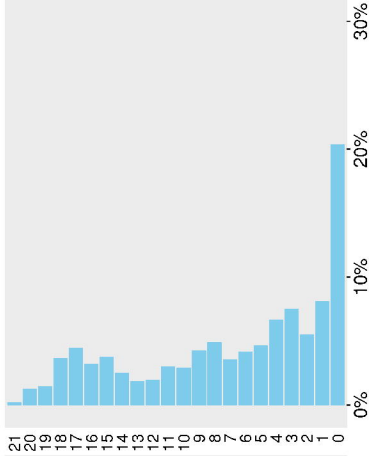

H3O

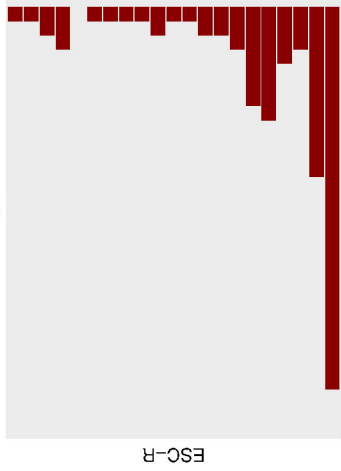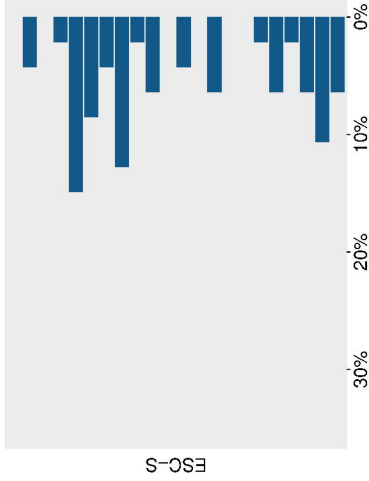

ESC-S
